# Supplementary material for: Emergence and potential transmission route of avian influenza A (H5N1) virus in domestic cats in Poland, June 2023
Source: PubMed Central journal article supplement (PMC10401914; doi:10.2807/1560-7917.es.2023.28.31.2300390), 2023-08-03
Supplement: 2300390_SupplementaryFigures.pdf [file 2300390_SupplementaryFigures.pdf]

This supplementary material is hosted by *Eurosurveillance* as supporting information alongside the article "Emergence and potential transmission route of avian influenza A (H5N1) in domestic cats in Poland, June 2023", on behalf of the authors, who remain responsible for the accuracy and appropriateness of the content. The same standards for ethics, copyright, attributions and permissions as for the article apply. Supplements are not edited by *Eurosurveillance* and the journal is not responsible for the maintenance of any links or email addresses provided therein.

## Supplementary figures

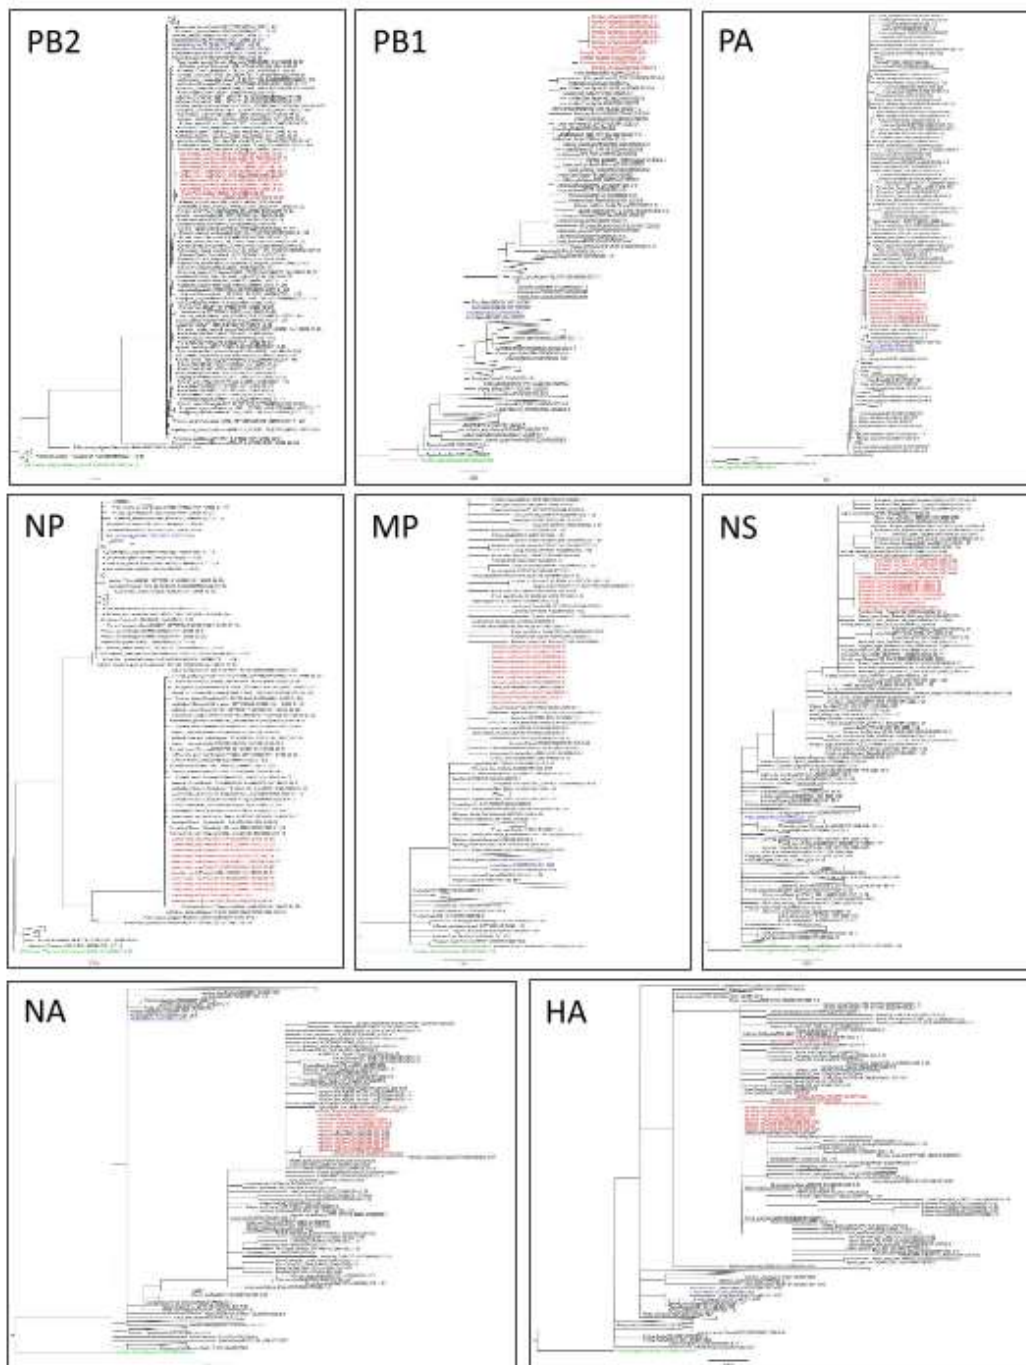

Figure S1.

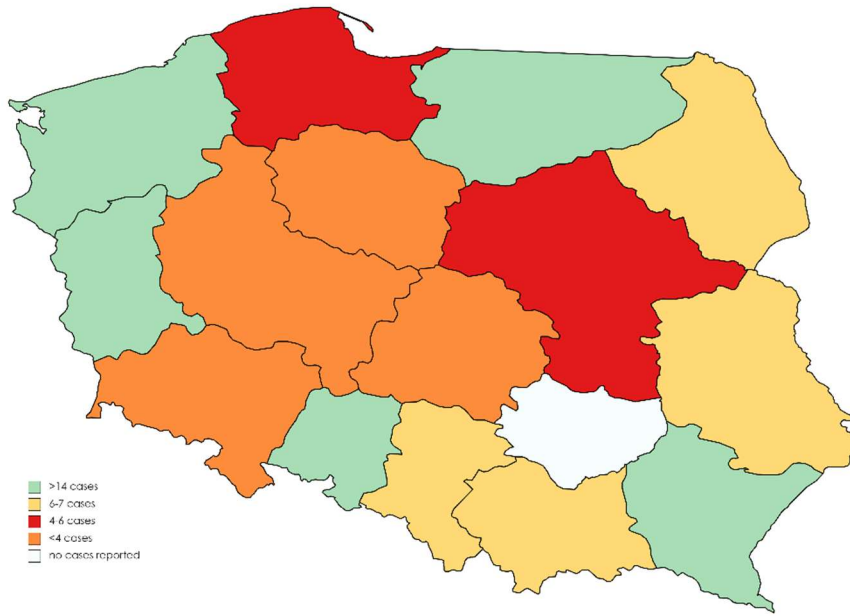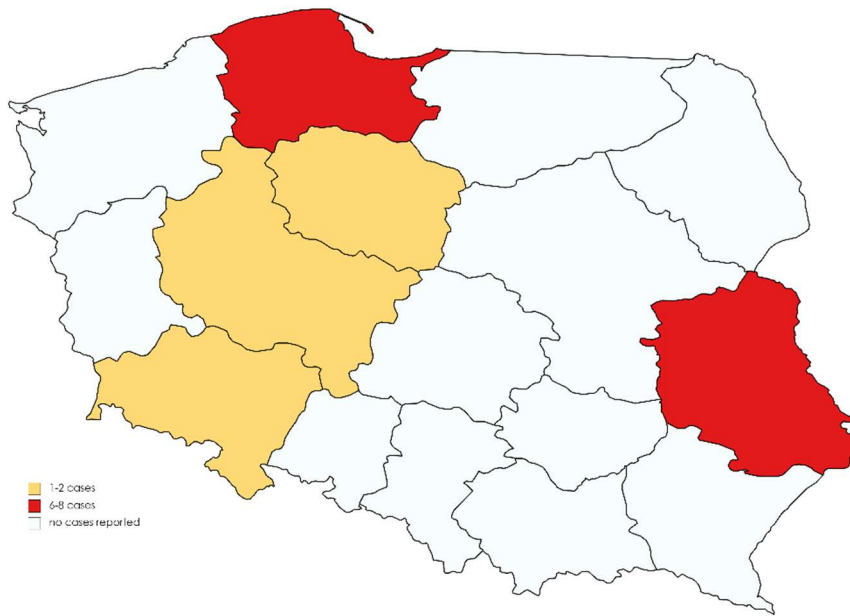

**Figure S2.**

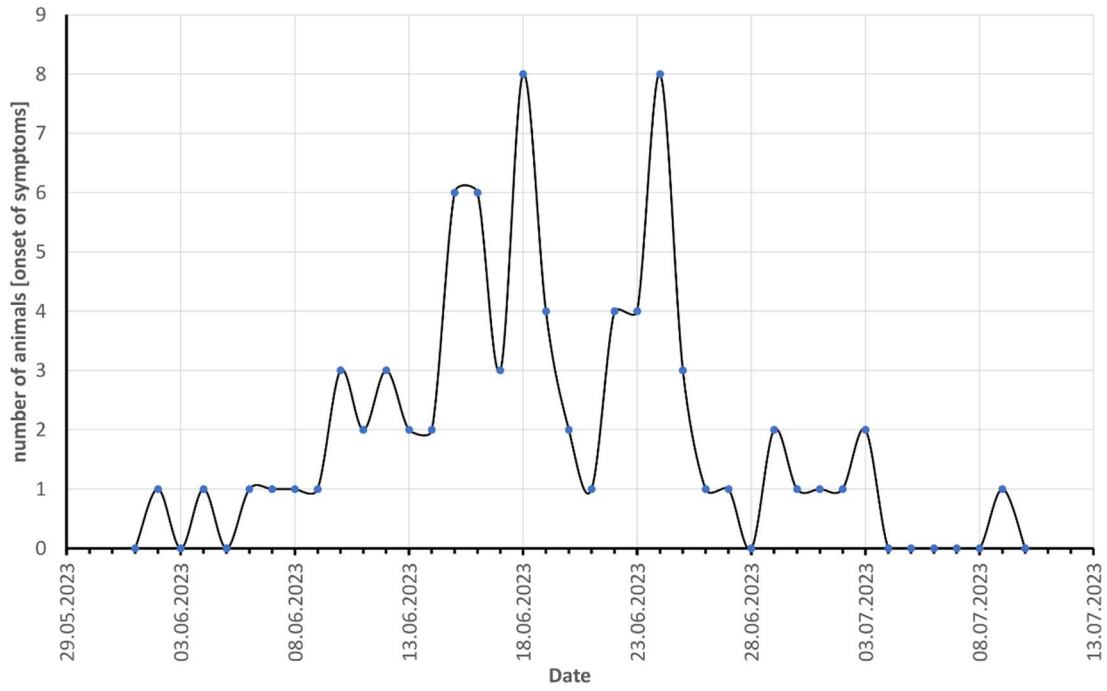

**Figure S3.**

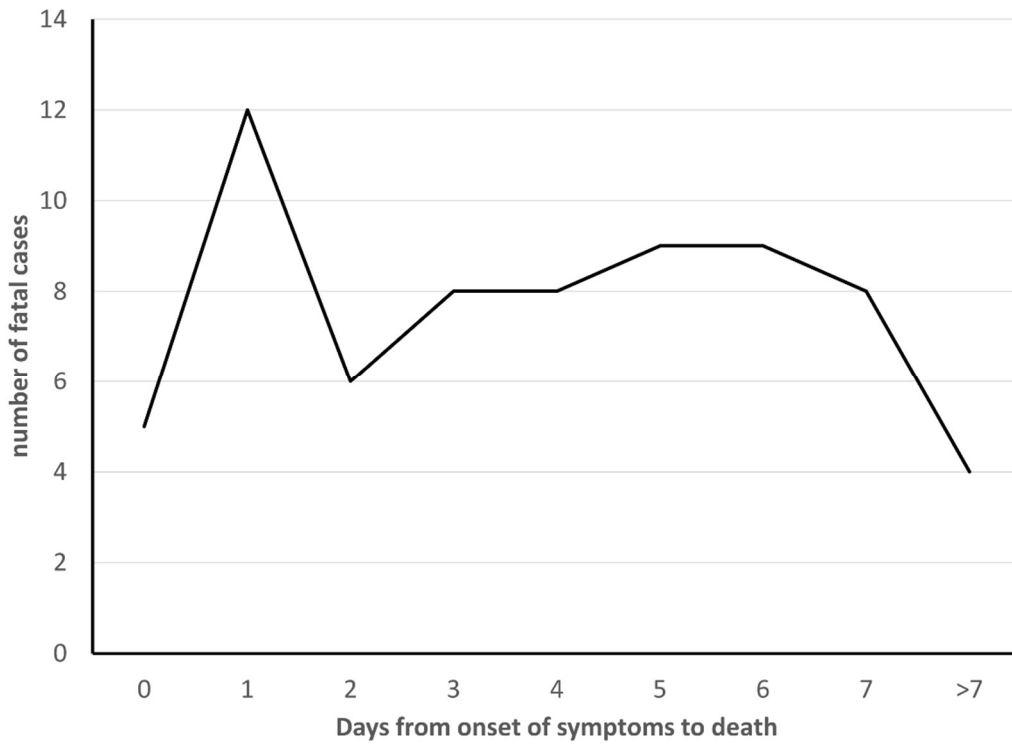

**Figure S4.**

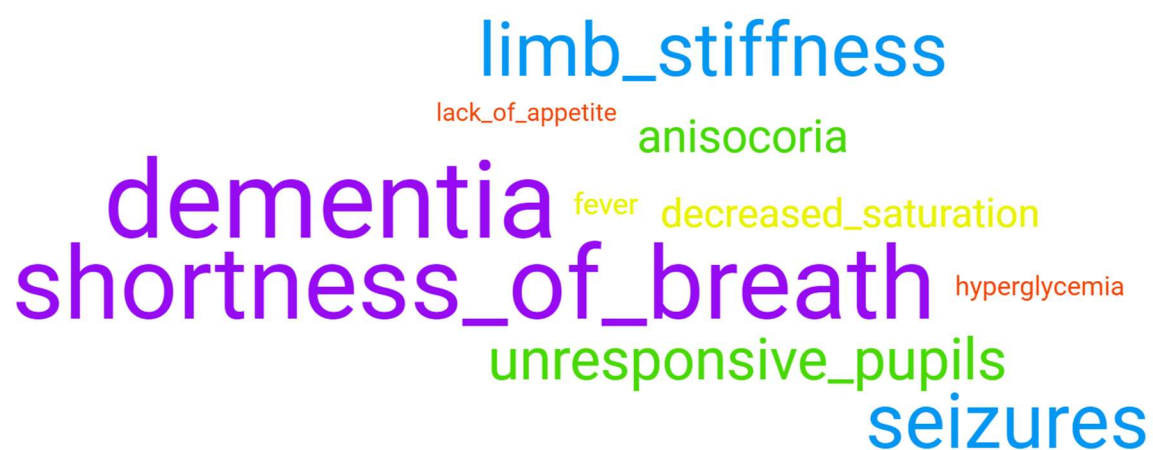

**Figure S5.**
